# Supplementary material for: Long-term exposure to carcinoma-associated fibroblasts makes breast cancer cells addictive to integrin β1
Source: PubMed Central journal article supplement (PMC5955132; doi:10.18632/oncotarget.25183), 2018-04-24
Supplement: oncotarget-09-22079-s001.pdf [file oncotarget-09-22079-s001.pdf]

# Long-term exposure to carcinoma-associated fibroblasts makes breast cancer cells addictive to integrin $\beta 1$

## SUPPLEMENTARY MATERIALS

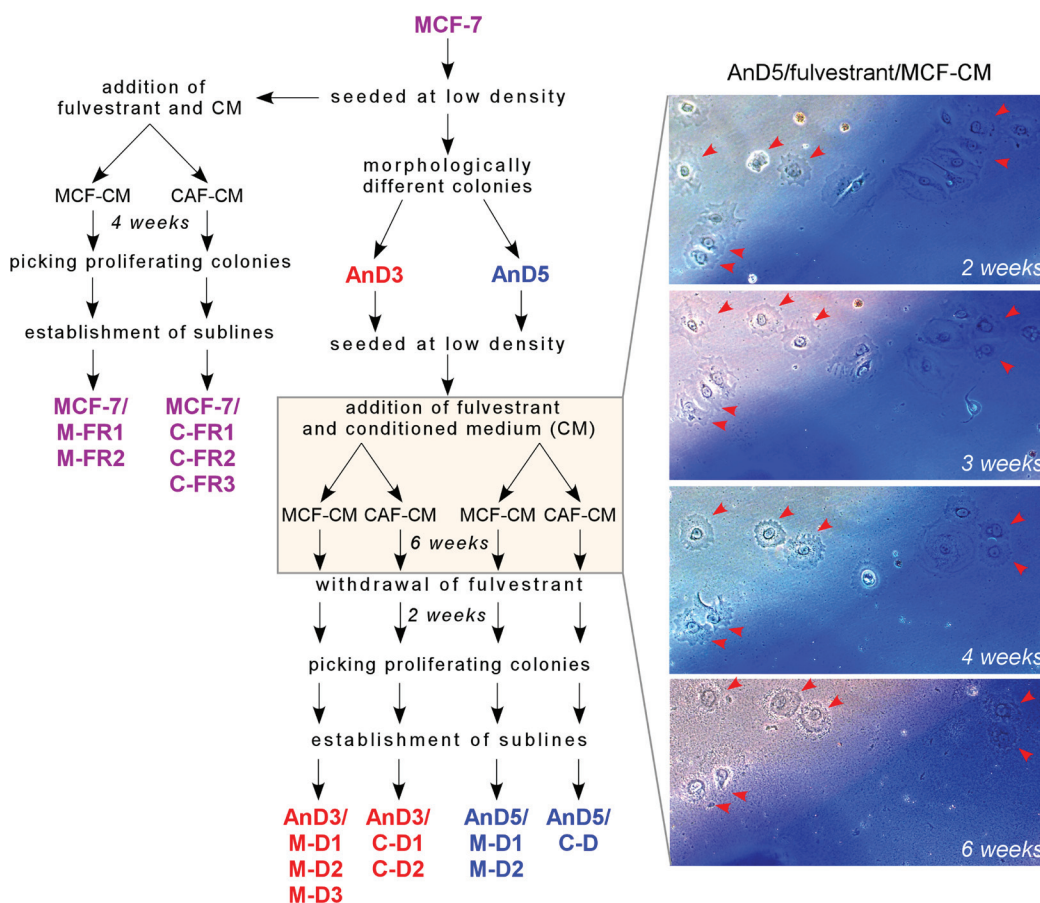

**Supplementary Figure 1: A schematic depicting the generation of the different MCF-7 sublines used in this study.** The right panel shows phase contrast images of the same AnD5 cells after 2, 3, 4 and 6 weeks of exposure to 1  $\mu$ M fulvestrant and MCF-CM. Most cells died and disintegrated. Arrow heads indicate those cells that were still visible after the six-week-treatment. C-D = CAF-CM treated Dormant cells, M-D = MCF-CM treated Dormant cells, C-FR = CAF-CM treated Fulvestrant-Resistant cells, M-FR = MCF-CM treated Fulvestrant-Resistant cells.

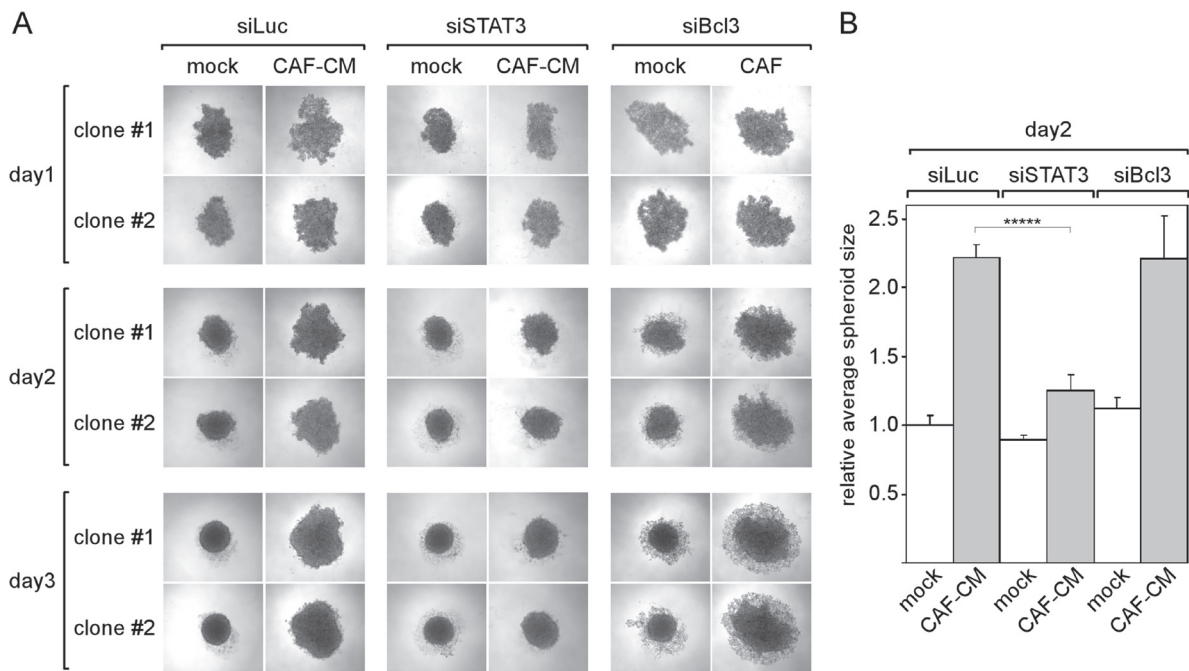

**Supplementary Figure 2: STAT3 is responsible for the CAF-CM-induced defect in proper spheroid formation.** MCF-7 cells were transfected with an STAT3-specific siRNA (siSTAT3), a Bcl-3 targeting siRNA (siBcl3) or a control siRNA (siLuc), incubated in 2D adhesion cultures for three days, trypsinized and transferred to 3D suspension cultures, where cell aggregation was monitored for three days (A). Spheroid size was determined by using the AxioVision R 4.5 software (Zeiss, Jena) at day 2 (B). The siRNAs are described elsewhere (Leyh et al. *Oncotarget* 2015, 6: 39307)
